# Supplementary material for: Survival, Growth Performance, and Hepatic Antioxidant and Lipid Profiles in Infected Rainbow Trout (Oncorhynchus mykiss) Fed a Diet Supplemented with Dihydroquercetin and Arabinogalactan
Source: MDPI journal article supplement (doi:10.3390/ani13081345), 2023-04-14
Supplement: s1 [file s1]

**Table S1.** Chemical composition of Efico alpha 717 diets according to the producer's specification (BioMar, Denmark).

| <b>Content</b>           | <b>Pellet fraction 3.0 mm</b> | <b>Pellet fraction 4.5 mm</b> |
|--------------------------|-------------------------------|-------------------------------|
| Crude protein, %         | 39-42                         | 39-42                         |
| Lipids, %                | 21-24                         | 21-24                         |
| Carbohydrates, %         | 19-22                         | 19-22                         |
| Alimentary fiber, %      | 4-5.9                         | 4-5.9                         |
| Ash substances, %        | 4-7                           | 4-7                           |
| Total phosphorus, %      | 0.8                           | 0.8                           |
| Energy for growth, mJ/kg | 21-24                         | 21-24                         |
| Digestible energy, mJ/kg | 18.3                          | 18.3                          |

**Table S2.** Lipid (% dry weight) and fatty acid (wt% total fatty acids) composition of Efico alpha 717 feed pellets.

| Size of pellets    | 3.0 mm     | 4.5 mm      |
|--------------------|------------|-------------|
| Lipid content      |            |             |
| Total lipids       | 23.28±0.37 | 24.03±0.53  |
| Phospholipids      | 0.00±0.00  | 0.16±0.24   |
| Triacylglycerols   | 18.68±0.45 | 18.55±0.94  |
| Cholesterol esters | 0.00±0.00  | 0.00±0.00   |
| Cholesterol        | 4.60±0.40  | 5.32±0.63   |
| Fatty acids        |            |             |
| 12:00              | 0.05±0.01  | 0.04±0.02   |
| 14:00              | 2.23±0.08  | 1.73±1.11   |
| 14:01              | 0.09±0.01  | 0.10±0.02   |
| 15:00              | 0.18±0.01  | 0.14±0.08   |
| 15:01              | 0.03±0.01  | 0.08±0.06   |
| 16:0               | 9.41±0.38  | 7.25±4.70   |
| 16:1n-7            | 2.27±0.09  | 1.70±1.04   |
| 17:00              | 0.31±0.04  | 0.29±0.16   |
| 17:01              | 0.21±0.05  | 0.18±0.11   |
| 18:0               | 2.54±0.25  | 2.00±1.15   |
| 18:1n-7            | 3.50±0.46  | 2.65±1.47   |
| 18:1n-9cis         | 43.03±0.43 | 32.39±21.03 |
| 18:2n-6cis         | 16.04±0.13 | 11.99±7.70  |
| 18:3n-6            | 0.19±0.13  | 0.42±0.35   |
| 18:3n-3            | 7.66±0.15  | 5.71±3.80   |
| 20:00              | 0.39±0.03  | 0.32±0.19   |
| 20:1n-9            | 3.34±0.62  | 2.43±1.70   |
| 20:4n-6            | 0.18±0.04  | 0.15±0.09   |
| 20:3n-3            | 0.10±0.01  | 0.10±0.02   |
| 20:3n-6            | 0.05±0.02  | 0.08±0.02   |
| 20:5n-3            | 3.54±0.17  | 2.73±1.73   |
| 21:00              | 0.15±0.03  | 0.13±0.04   |
| 22:00              | 0.10±0.03  | 0.09±0.02   |
| 22:1n-9            | 0.20±0.10  | 0.21±0.08   |
| 22:2n-6            | 0.08±0.01  | 0.08±0.03   |
| 22:6n-3            | 3.44±0.50  | 2.61±1.67   |
| 23:00              | 0.18±0.01  | 0.18±0.06   |
| 24:00              | 0.31±0.11  | 0.24±0.14   |
| 24:1n-9            | 0.14±0.04  | 0.18±0.04   |
| n-3/n-6            | 1.05±0.01  | 1.1±0.01    |

**Table S3.** Water quality at various distance from fish farming cages:

1 – 500 m north of the cages, 1 m depth; 2 – 500 m north of the cages, 5 m depth; 3 – in cages, 1 m depth; 4 – in cages, 5 m depth; 5 – 500 m south of cages, 1 m depth; 6 – 500 m south of cages, 5m depth .

| Sampling date                                 | 29.06       |               |               |               |               |               | 04.10         |           |               |           |           |             |
|-----------------------------------------------|-------------|---------------|---------------|---------------|---------------|---------------|---------------|-----------|---------------|-----------|-----------|-------------|
| Indicators                                    | 1           | 2             | 3             | 4             | 5             | 6             | 1             | 2         | 3             | 4         | 5         | 6           |
| pH, units pH                                  | 6.69±0.05   | 6.69±0.05     | 6.94±0.05     | 6.82±0.05     | 6.66±0.05     | 6.67±0.05     | 7.18±0.05     | 7.30±0.05 | 7.15±0.05     | 6.92±0.05 | 7.22±0.05 | 6.85±0.05   |
| Suspended substances, mg/ml                   | 6.2±1.1     | 5.9±1.1       | 6.0±1.1       | 6.1±1.1       | 5.4±1.1       | 6.0±1.1       | 0.7±0.1       | 0.9±0.2   | 0.8±0.2       | 1.1±0.2   | 0.9±0.2   | 1.0±0.2     |
| BOD 5, mgO <sub>2</sub> /ml                   | 0.8±0.2     | 0.9±0.2       | 0.7±0.2       | 0.8±0.2       | 0.9±0.2       | 0.6±0.2       | 0.7±0.2       | 0.8±0.2   | 0.7±0.2       | 0.5±0.2   | 0.7±0.2   | 0.8±0.2     |
| PO <sub>4</sub> <sup>3-</sup> , mg/ml         | < 0.25      | < 0.25        | < 0.25        | < 0.25        | < 0.25        | < 0.25        | < 0.25        | < 0.25    | < 0.25        | < 0.25    | < 0.25    | < 0.25      |
| Phosphorus, mg/ml                             | < 0.02      | < 0.02        | < 0.02        | < 0.02        | < 0.02        | < 0.02        | < 0.02        | < 0.02    | < 0.02        | < 0.02    | < 0.02    | < 0.02      |
| NH <sub>4</sub> <sup>+</sup> , mg/ml          | < 0.5       | < 0.5         | < 0.5         | < 0.5         | < 0.5         | < 0.5         | < 0.5         | < 0.5     | < 0.5         | < 0.5     | < 0.5     | < 0.5       |
| Oil products, mg/ml                           | 0.007±0.004 | 0.007±0.004   | 0.006±0.003   | < 0.005       | 0.005±0.003   | < 0.005       | 0.0075±0.0037 | < 0.005   | 0.0098±0.0049 | < 0.005   | < 0.005   | 0.008±0.004 |
| Iron, mg/ml                                   | 0.012±0.003 | 0.0019±0.0004 | 0.0015±0.0004 | 0.0017±0.0004 | 0.0022±0.0004 | 0.0014±0.0004 | < 0.001       | < 0.001   | < 0.001       | < 0.001   | < 0.001   | < 0.001     |
| Permanganate oxidation, mg O <sub>2</sub> /ml | 4.6±0.5     | 4.7±0.5       | 4.6±0.5       | 5.1±0.5       | 5.0±0.5       | 4.8±0.5       | 3.8±0.4       | 3.9±0.4   | 3.7±0.4       | 4.0±0.4   | 3.8±0.4   | 4.0±0.4     |

**Table S4.** Fish mortality (cumulative deaths, % of all fish) over the observation period.

| Date  | Supplement-free | Supplement-fed |
|-------|-----------------|----------------|
| 06.07 | 0.0             | 0.0            |
| 31.07 | 0.9             | 0.9            |
| 31.08 | 3.1             | 1.6            |
| 30.09 | 4.3             | 2.2            |
| 31.10 | 4.4             | 2.3            |
| 30.11 | 6.5             | 2.5            |

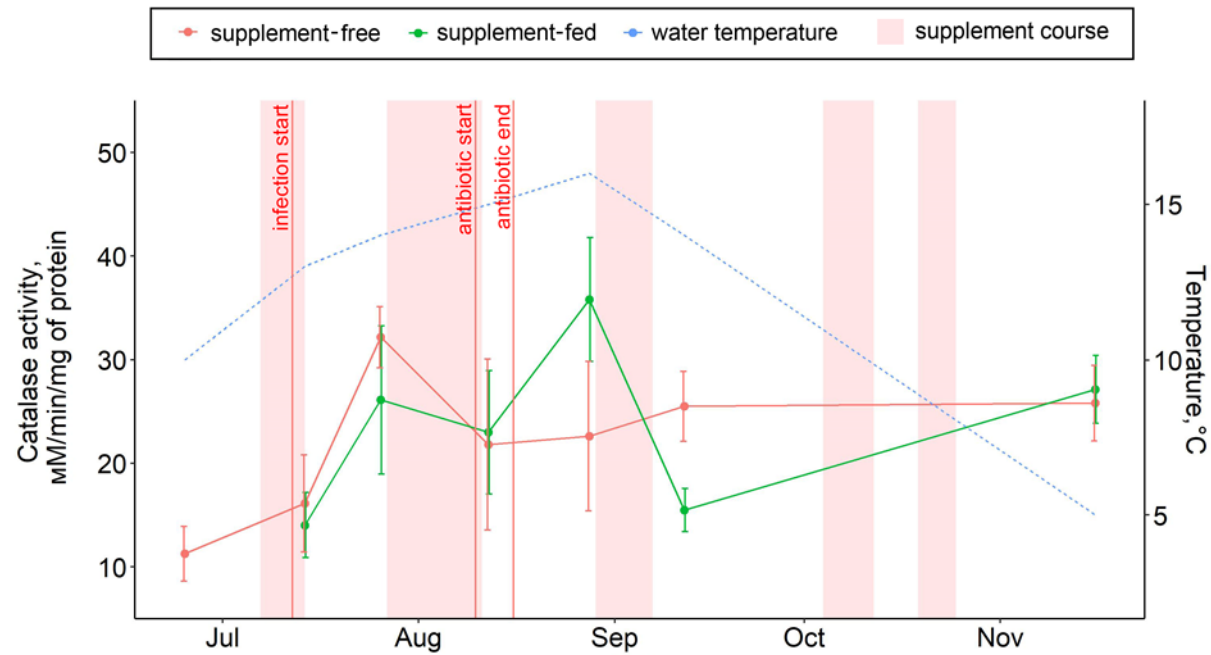

**Figure S1.** Hepatic catalase activity in supplement-free and supplement-fed *O. mykiss*.

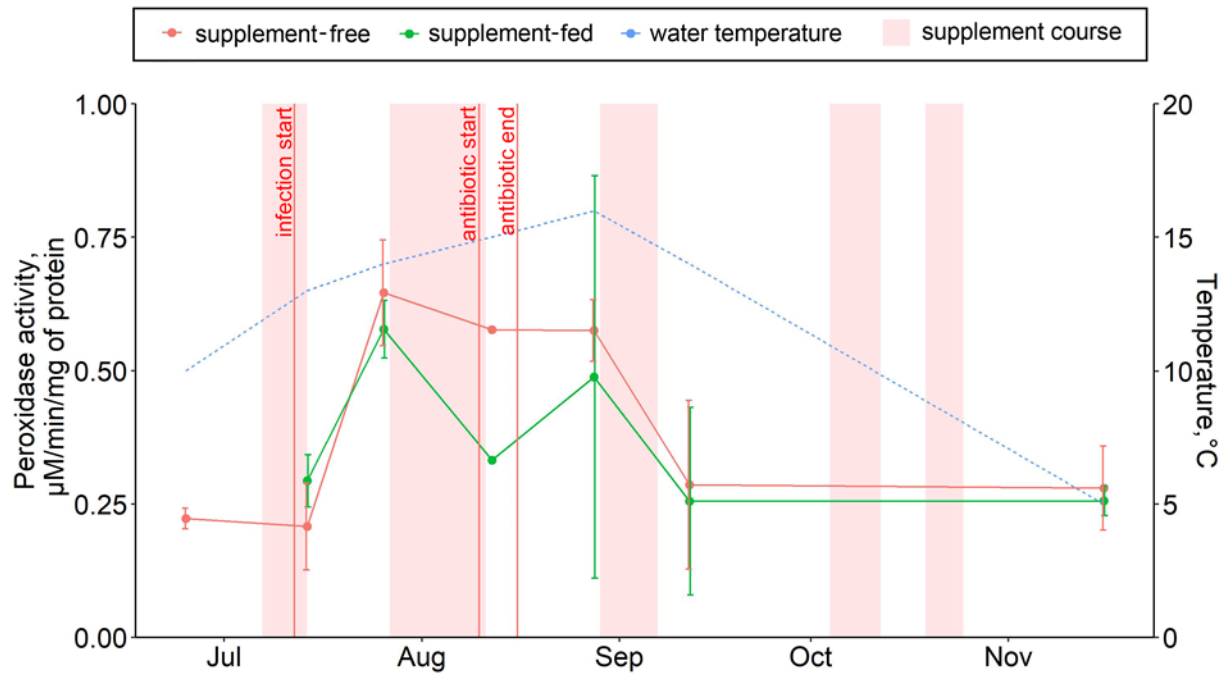

Figure S2. Hepatic peroxidase activity in supplement-free and supplement-fed *O. mykiss*.

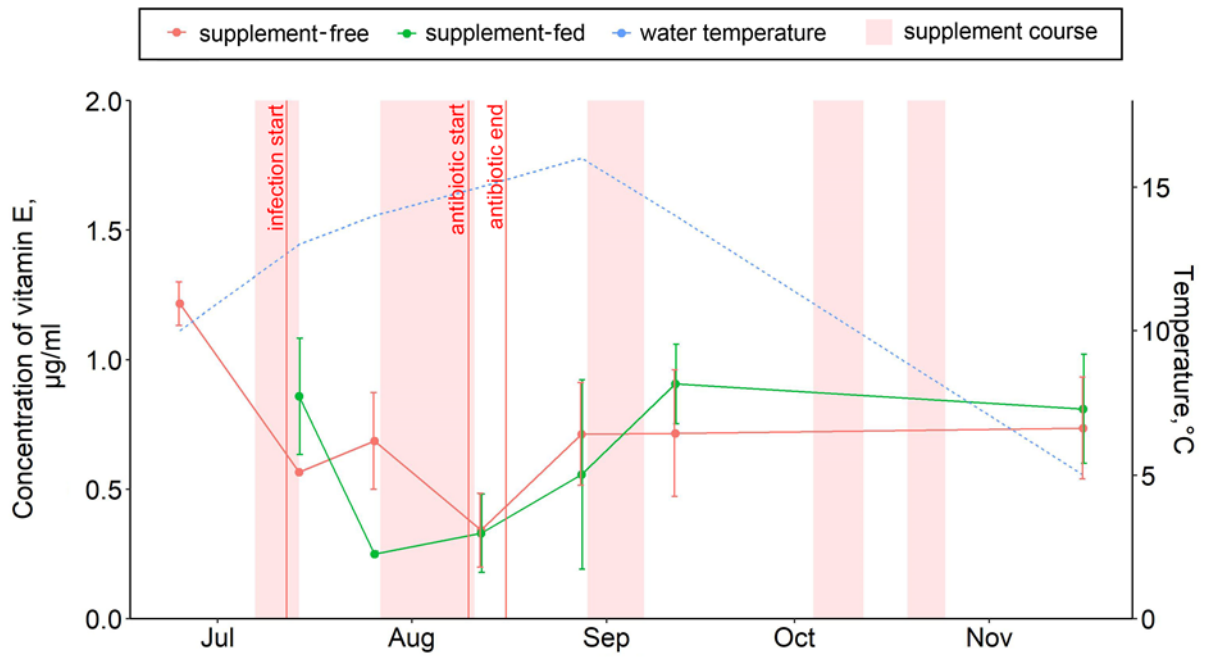

Figure S3. Hepatic vitamin E content in supplement-free and supplement-fed *O. mykiss*.

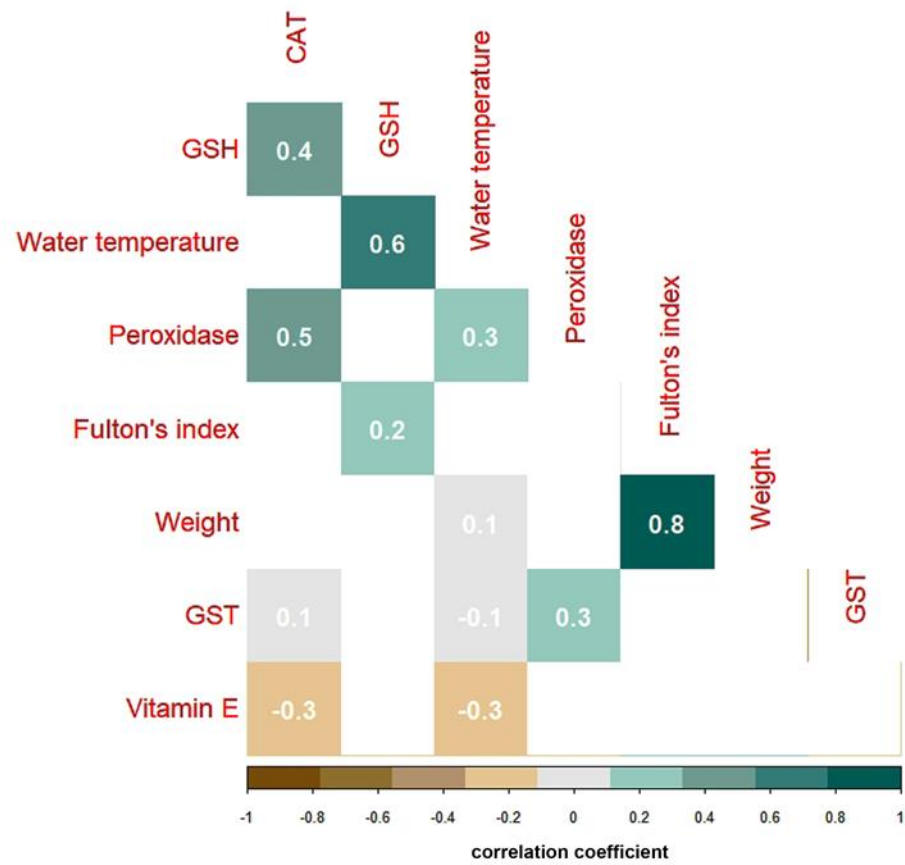

**Figure S4.** Correlations of antioxidant components in *O. mykiss* liver with fish weight and water temperature ( $p \geq 0.05$  not shown). Abbreviations: CAT, catalase; GSH, reduced glutathione; GST, glutathione S-transferase.

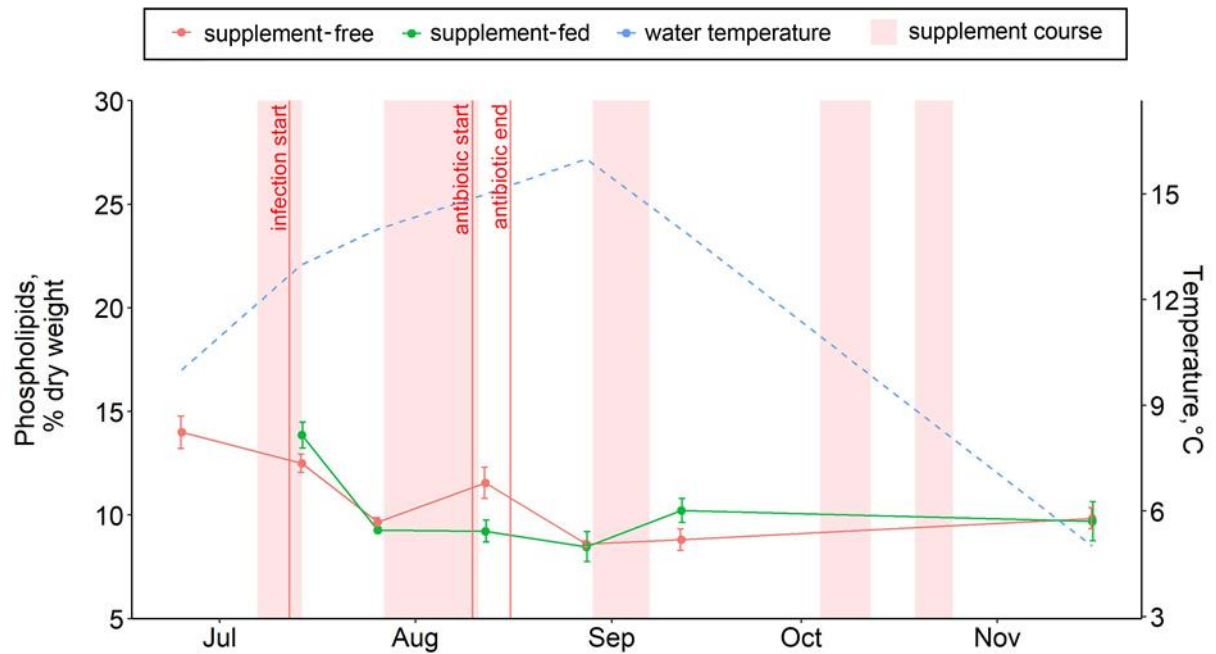

**Figure S5.** Hepatic phospholipid content in supplement-free and supplement-fed *O. mykiss*.

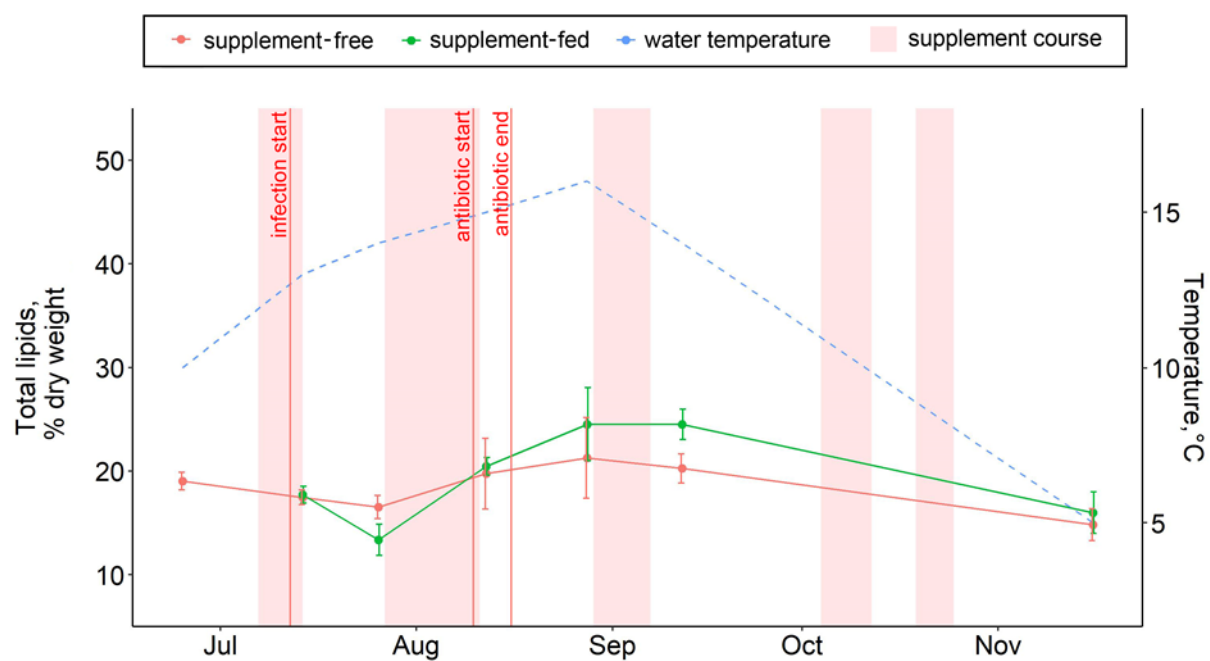

**Figure S6.** Hepatic total lipid content in supplement-free and supplement-fed *O. mykiss*.

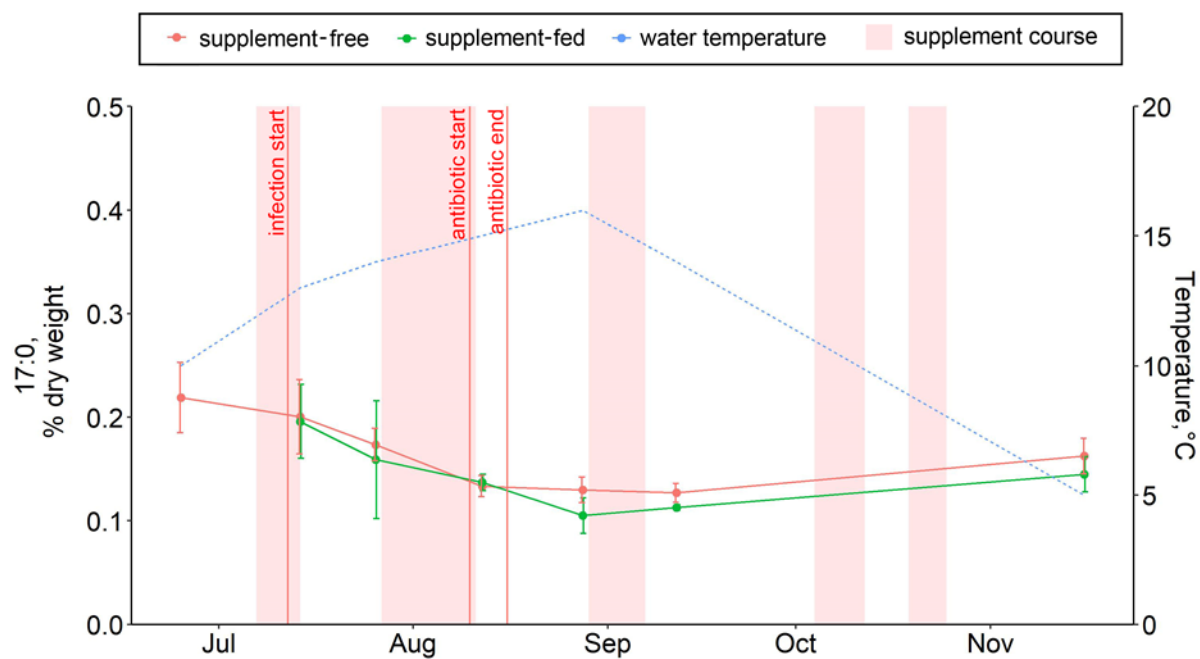

**Figure S7.** Hepatic 17:0 fatty acid content in supplement-free and supplement-fed *O. mykiss*.

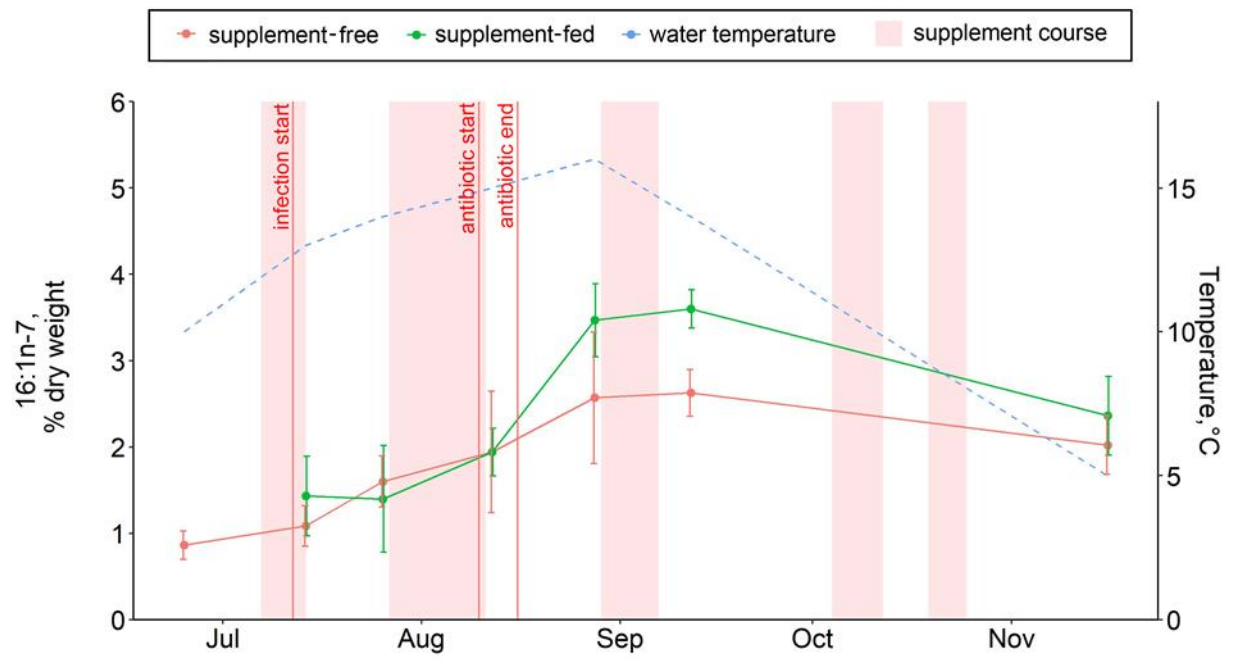

**Figure S8.** Hepatic palmitoleic 16:1n-7 fatty acid content in supplement-free and supplement-fed *O. mykiss*.

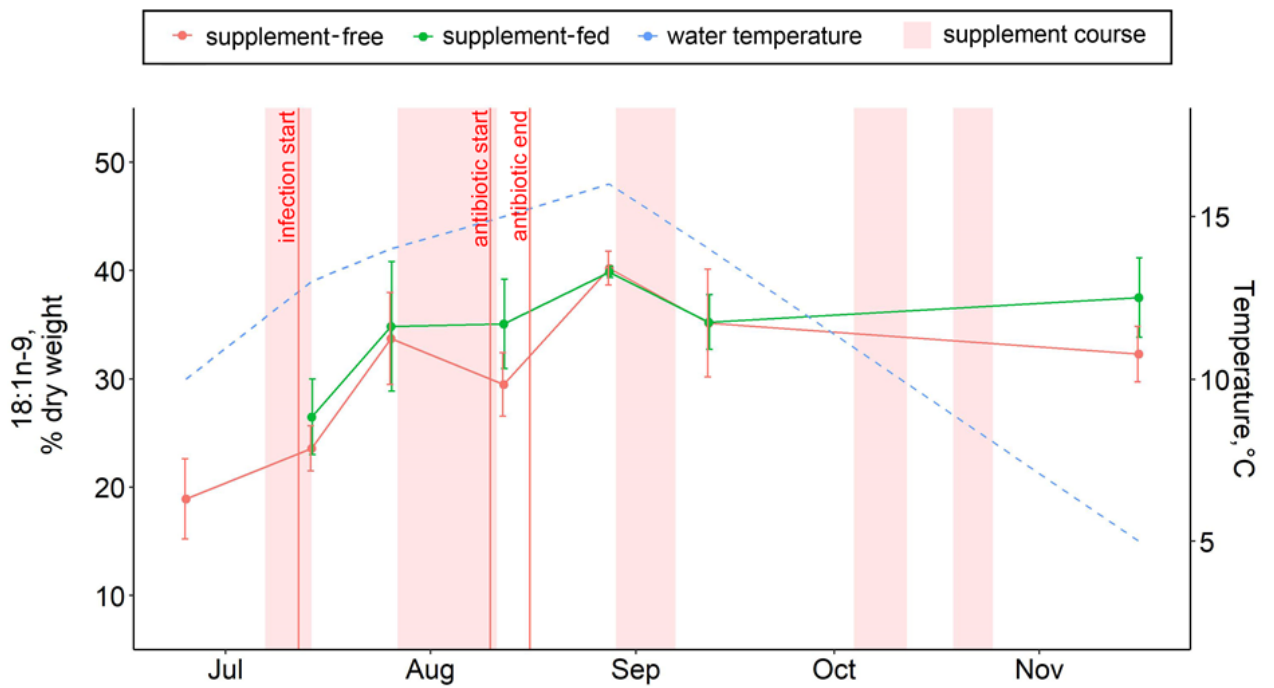

**Figure S9.** Hepatic oleic 18:1n-9 fatty acid content in supplement-free and supplement-fed *O. mykiss*.

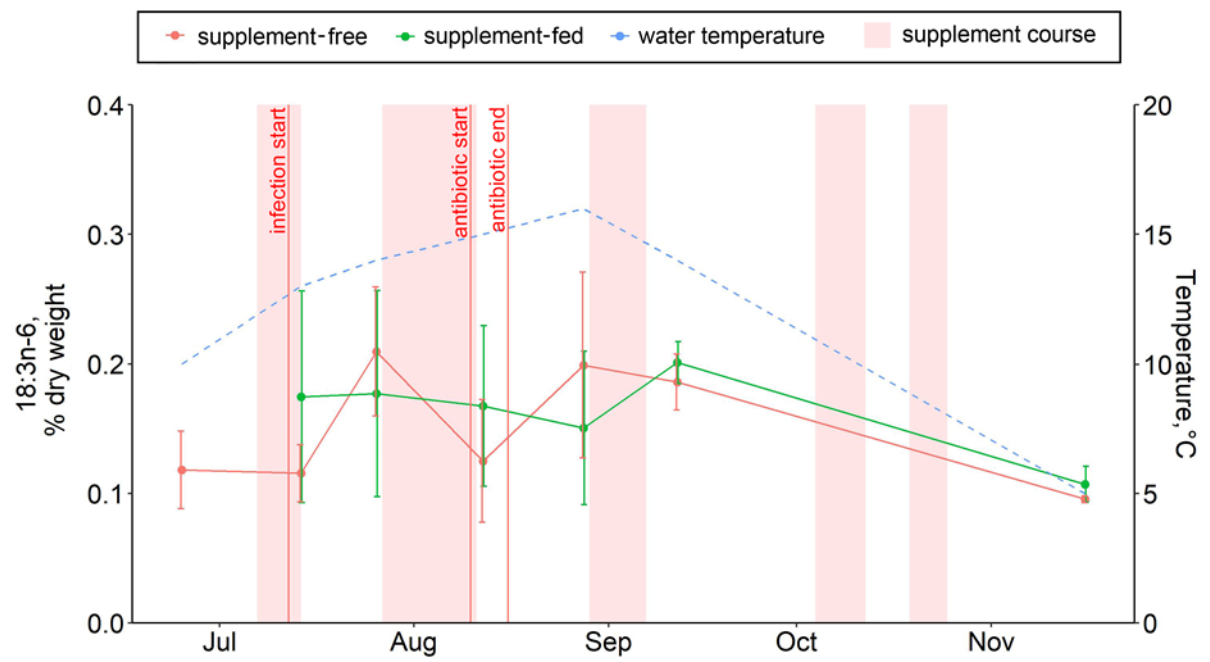

**Figure S10.** Hepatic gamma-linolenic 18:3n-6 fatty acid content in supplement-free and supplement-fed *O. mykiss*.

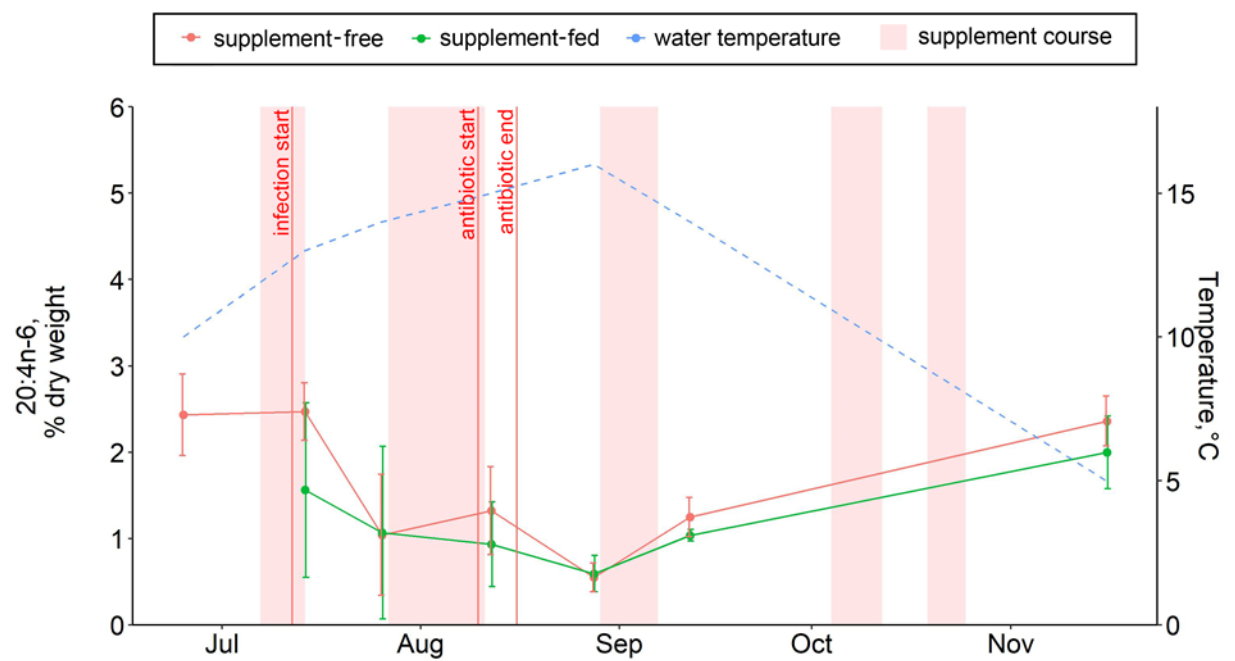

**Figure S11.** Hepatic arachidonic 20:4n-6 fatty acid content in supplement-free and supplement-fed *O. mykiss*.

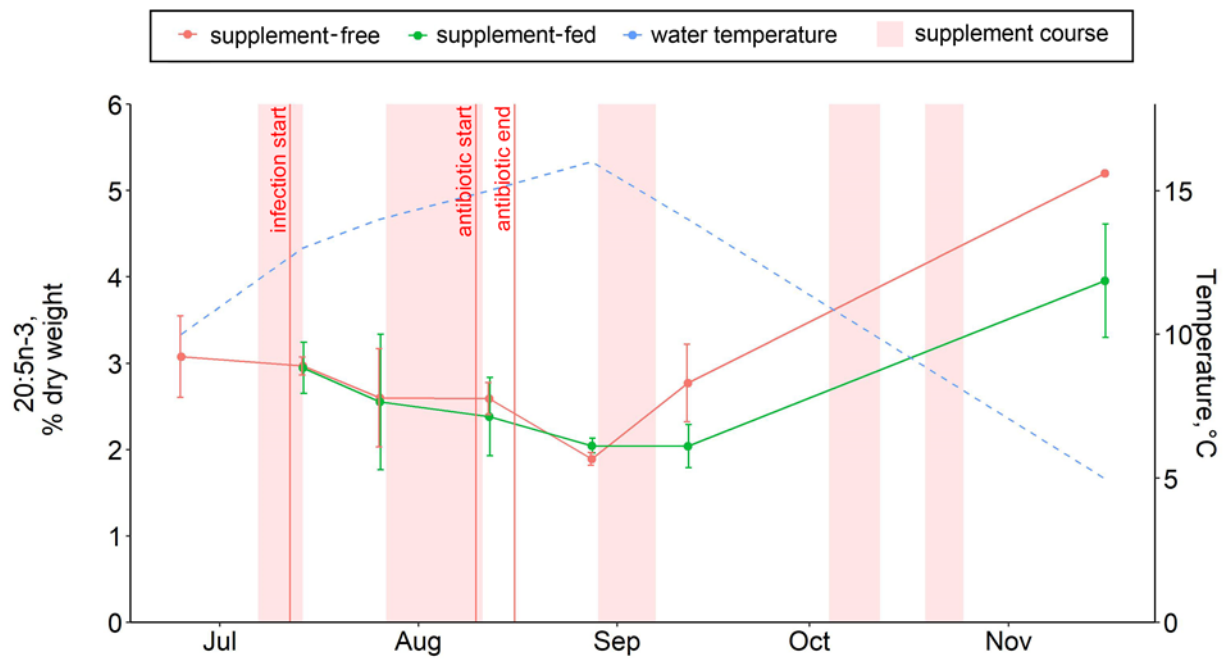

**Figure S12.** Hepatic eicosapentaenoic 20:5n-3 fatty acid content in supplement-free and supplement-fed *O. mykiss*.

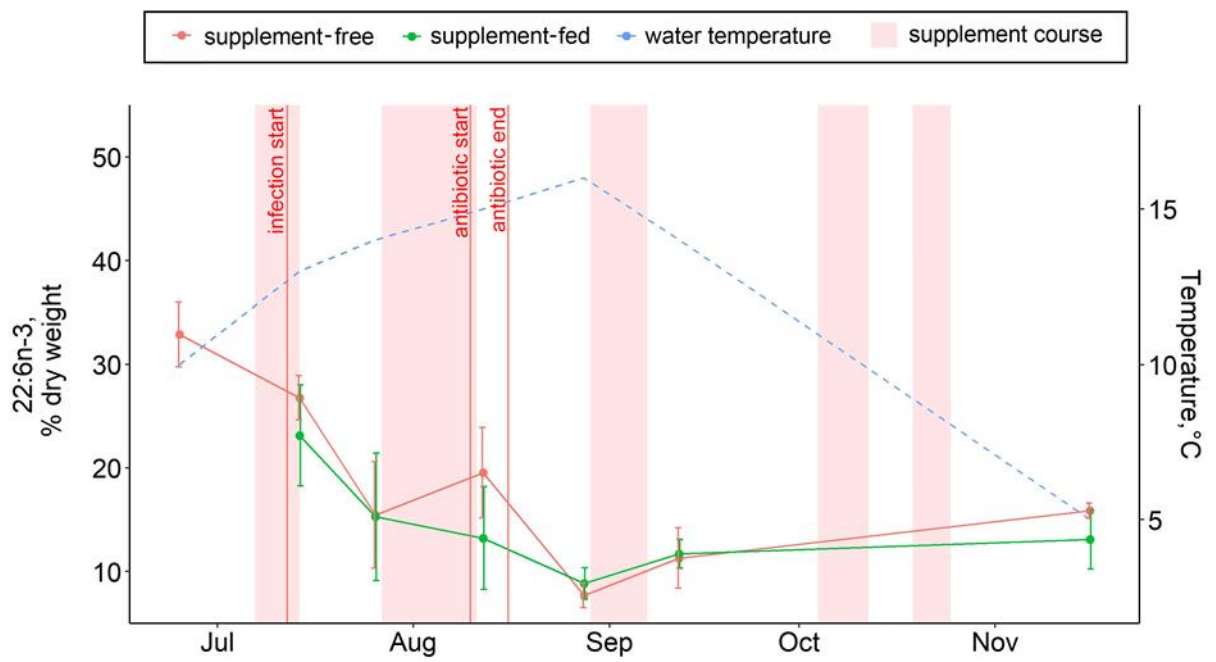

**Figure S13.** Hepatic docosahexaenoic 22:6n-3 fatty acid content in supplement-free and supplement-fed *O. mykiss*.
